# Supplementary material for: Ionophore-Based Potassium Selective Fluorescent Organosilica Nano-Optodes Containing Covalently Attached Solvatochromic Dyes
Source: MDPI journal article supplement (doi:10.3390/chemosensors10010023), 2022-01-07
Supplement: s1 [file s1]

# Ionophore-Based Potassium Selective Fluorescent Organosilica Nano-Optodes Containing Covalently Attached Solvatochromic Dyes

Yupu Zhang <sup>1</sup>, Xinfeng Du <sup>2</sup> and Xiaojiang Xie <sup>1,\*</sup>

<sup>1</sup> Department of Chemistry, Southern University of Science and Technology, Shenzhen 518055, China; 12032864@mail.sustech.edu.cn

<sup>2</sup> School of Chemistry and Chemical Engineering, Harbin Institute of Technology, Harbin 150001, China; 11849569@mail.sustech.edu.cn

\* Correspondence: xiexj@sustech.edu.cn

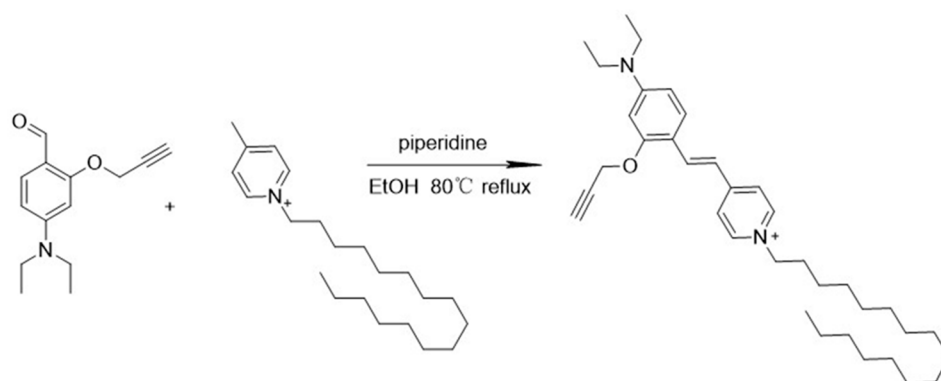

Figure S1. Synthesis of the solvatochromic dye (SD).

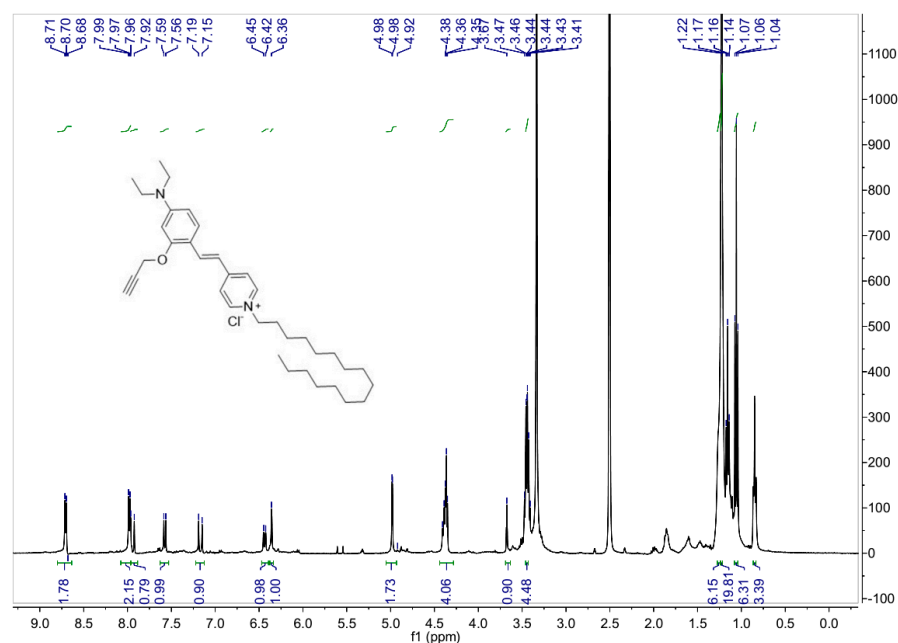

Figure S2. <sup>1</sup>H NMR spectra for SD.

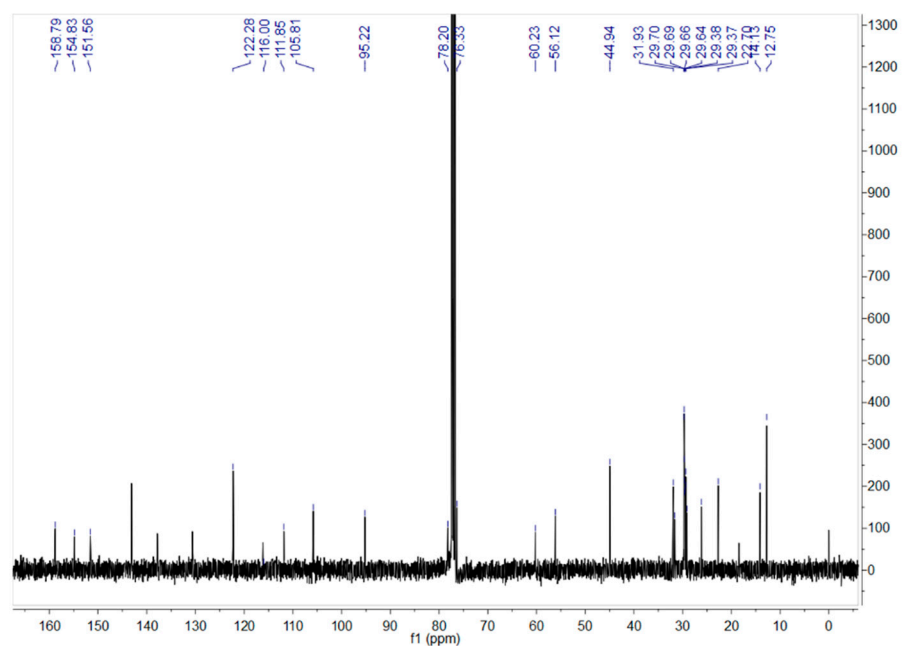

**Figure S3.**  $^{13}\text{C}$  NMR spectra for SD.

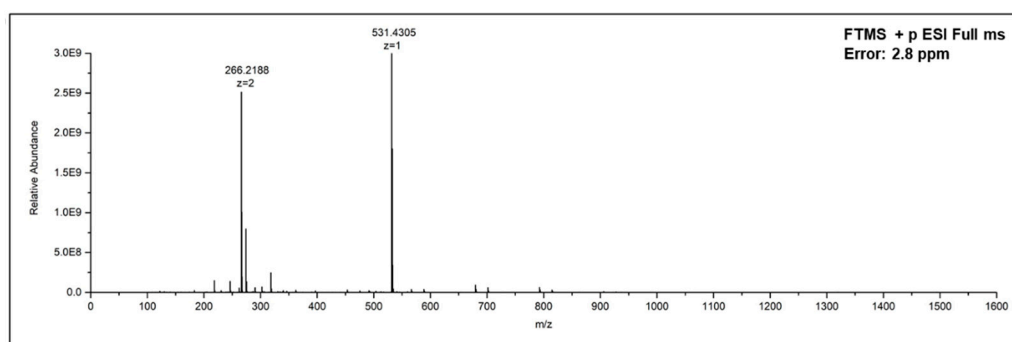

**Figure S4.** Mass Spectrometry for SD.

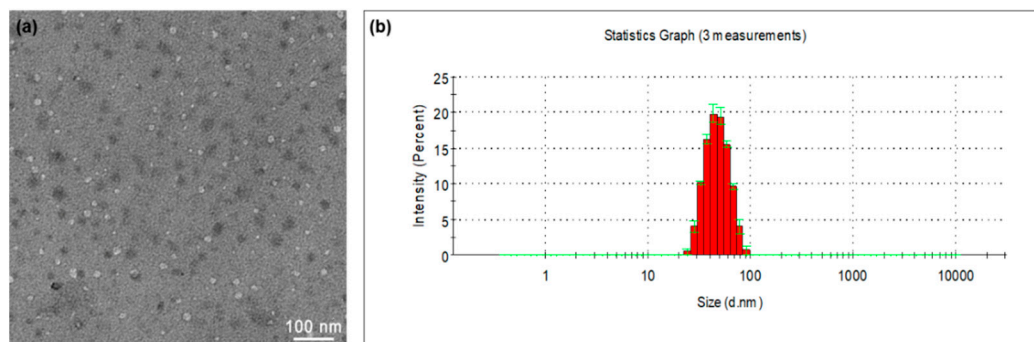

**Figure S5.** Transmission electron microscopy (TEM) image and the size distribution from dynamic light scattering (DLS) for the nanoparticles.

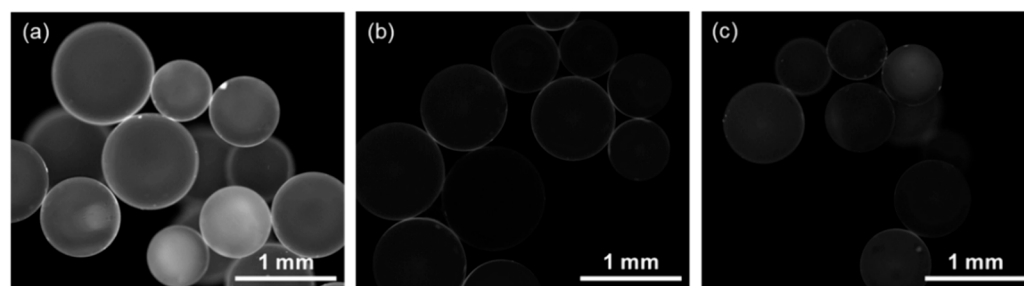

**Figure S6.** The fluorescence microscope images of cation exchange resin after treatment with the different solutions: **(a)** a suspension of organosilica nanoparticles with SDs directly adsorbed on the surface. **(b)** a suspension of organosilica nanoparticles with SDs covalently clicked on the surface. **(c)** water as a reference.
